# 1 Atazanavir is a competitive inhibitor of SARS-CoV-2 M<sup>pro</sup>, im- 2 pairing variants replication *in vitro* and *in vivo*

3 Otávio Augusto Chaves <sup>1,2,#,\*</sup>, Carolina Q. Sacramento <sup>1,2,#</sup>, André C. Ferreira <sup>1,2,3,#</sup>, Mayara Mattos <sup>1,2,#</sup>, Natalia  
4 Fintelman-Rodrigues <sup>1,2</sup>, Jairo R. Temerozo <sup>4,5</sup>, Douglas Pereira Pinto <sup>6</sup>, Gabriel P. E. da Silveira <sup>6</sup>, Laís Bastos da  
5 Fonseca <sup>6</sup>, Heliana Martins Pereira <sup>6</sup>, Aluana Santana Carlos <sup>3</sup>, Joana da Costa Pinto d'Ávila <sup>1,3</sup>, João P.B. Viola <sup>7</sup>,  
6 Robson Q. Monteiro <sup>8</sup>, Leonardo Vazquez <sup>1</sup>, Patrícia T. Bozza <sup>1</sup>, Hugo Caire Castro-Faria-Neto <sup>1</sup> and Thiago Moreno  
7 L. Souza <sup>1,2,\*</sup>

8 <sup>1</sup>Laboratory of Immunopharmacology, Oswaldo Cruz Institute (IOC), Oswaldo Cruz Foundation (Fiocruz), Rio de  
9 Janeiro, RJ, Brazil;

10 <sup>2</sup>National Institute for Science and Technology on Innovation on Neglected Diseases (INCT/IDN), Center for  
11 Technological Development in Health (CDTS), Oswaldo Cruz Foundation (Fiocruz), Rio de Janeiro, RJ, Brazil;

12 <sup>3</sup>Preclinical Research Laboratory, Universidade Iguazu - UNIG, Nova Iguaçu, RJ, Brazil;

13 <sup>4</sup>Laboratory on Thymus Research, Oswaldo Cruz Institute (IOC), Oswaldo Cruz Foundation (Fiocruz), Rio de Janeiro,  
14 RJ, Brazil;

15 <sup>5</sup>National Institute for Science and Technology on Neuroimmunomodulation (INCT/NIM), Oswaldo Cruz Institute  
16 (IOC), Oswaldo Cruz Foundation (Fiocruz), Rio de Janeiro, RJ, Brazil;

17 <sup>6</sup>Laboratory of Pharmacokinetics, Vice Presidency of Research, and Innovation in Health - Oswaldo Cruz Foundation  
18 (Fiocruz), Rio de Janeiro, Brazil;

19 <sup>7</sup>Program of Immunology and Tumor Biology, Brazilian National Cancer Institute (INCA), Rua André Cavalcanti 37,  
20 5<sup>th</sup> floor, Centro, Rio de Janeiro, Brazil;

21 <sup>8</sup>Institute of Medical Biochemistry Leopoldo de Meis, Federal University of Rio de Janeiro, Rio de Janeiro, Brazil.

22 # These authors contributed equally to this work

23 \* Correspondences: [otavioaugustochaves@gmail.com](mailto:otavioaugustochaves@gmail.com) (O.A.C.), [tmoreno@cdts.fiocruz.br](mailto:tmoreno@cdts.fiocruz.br) (T.M.L.S.)

24

25 **Abstract:** Atazanavir (ATV) has already been considered as a potential repurposing drug to 2019 coronavirus disease (COVID-19),  
26 however, there are controversial reports on its mechanism of action and effectiveness as anti-severe acute respiratory syndrome  
27 coronavirus 2 (SARS-CoV-2). Through the pre-clinical chain of experiments: enzymatic, molecular docking, cell-based, and *in vivo*  
28 assays, it is demonstrated here that both SARS-CoV-2 B.1 lineage and variant of concern gamma are susceptible to this antiretrovi-  
29 ral. Enzymatic assays and molecular docking calculations showed that SARS-CoV-2 main protease (M<sup>pro</sup>) was inhibited by ATV,  
30 with Morrison's inhibitory constant (K<sub>i</sub>) 1.5-fold higher than boceprevir (GC376, a positive control). ATV was a competitive inhibi-  
31 tion, increasing the M<sup>pro</sup>'s Michaelis-Menten (K<sub>m</sub>) more than 6-fold. Cell-based assays indicated that SARS-CoV-2 gamma is more  
32 susceptible to ATV than its predecessor strain B.1. Using oral administration of ATV in mice to reach plasmatic exposure similar to  
33 humans, transgenic mice expression in human angiotensin converting enzyme 2 (K18-hACE2) were partially protected against  
34 lethal challenge with SARS-CoV-2 gamma. Moreover, less cell death and inflammation were observed in the lung from infected  
35 and treated mice. Our studies may contribute to a better comprehension of the M<sup>pro</sup>/ATV interaction, which could pave the way to  
36 the development of specific inhibitors of this viral protease.

37 **Keywords:** SARS-CoV-2, COVID-19, repurposing drugs; atazanavir; protease inhibitor, pharmacokinetics, molecular docking.

## 38 1. Introduction

39 The 2019 coronavirus disease (COVID-19) was firstly reported in Wuhan (China) and its etiological agent, severe  
40 acute respiratory syndrome coronavirus 2 (SARS-CoV-2), spread globally into the second pandemic of the 21<sup>st</sup> centu-  
41 ry, after influenza A(H1N1) pandemic in 2009. SARS-CoV-2 continuously circulate, even among individuals with  
42 preexisting immunity, and caused about 258 million confirmed cases along with 5.16 million deaths worldwide [1-5].  
43 SARS-CoV-2 variants of concern (VoC) might escape the humoral immune response to natural infection or vaccination  
44 [4,5], which reinforces the necessity of specific antiviral treatments. After almost a two-year effort in the repurposing

45 of clinically approved drugs, limited benefit for COVID-19 patients have been demonstrated [5]. Thus, it is necessary  
46 to improve the pre-clinical characterization of repurposed drugs to rationalize further clinical studies, in terms of po-  
47 sology and susceptibility of VoC, and learn from their interactions with the viral target enzyme.

48 We have previously described that atazanavir (ATV), a clinically approved human immunodeficiency virus  
49 (HIV) protease inhibitor [6], is endowed with anti-SARS-CoV-2 activity [7]. Although we described early in the pan-  
50 demic outbreak the ATV's activity against SARS-CoV-2, by *in silico* and cell-based assays (in Vero-E6 and A549 cell  
51 lines), proper characterization of its enzymatic target, pharmacology on type II pneumocytes (the most affect cell in  
52 severe COVID-19) and antiviral activity in infected mice have not been described. Nevertheless, numerous clinical  
53 trials were initiated for out- and in-patients with COVID-19 to test ATV combined or not with other commercial  
54 drugs, such as ritonavir or dexamethasone [7-9], however no definitive response emerged from these clinical trials yet.

55 Studies reconfirmed, by bioinformatics and basic enzymatic inhibition curves, that ATV targets SARS-CoV-2  
56 major protease ( $M^{pro}$ ), an enzyme responsible for the cleavage of eleven sites of the viral polyprotein, a key-step in  
57 virus life cycle [10,11]. The development of PAXLOVID™ from Pfizer and its clinical efficacy of reduce hospitalization  
58 by 80% reconfirms that  $M^{pro}$  is a very important druggable target [12]. Thus, other drugs that target this enzyme de-  
59 serve a more detailed characterization, to provide insight on pharmacophoric regions for next generation of anti-  
60 COVID-19 antivirals.

61 Anti- $M^{pro}$  from ATV has been disputed as controversial depending on assay conditions [13]. This apparent par-  
62 adox reinforces that detailed mechanism of action and robust series of pre-clinical experiments should be conducted  
63 to shed light on the ATV inhibitory mechanism and the susceptibility of contemporaneous SARS-CoV-2 strains to this  
64 drug. Here, we address additional explanations to controversial effects of ATV on  $M^{pro}$ , characterizing it as a competi-  
65 tive inhibitor of this viral enzyme that requires a catalytic water to be effective. ATV possesses anti-SARS-CoV-2 activ-  
66 ity against B.1 and gamma strains on Calu-3 cells, a model of type II pneumocytes. ATV reached the plasma and lungs  
67 of treated Swiss-Webster mice and protected SARS-CoV-2-infected transgenic mice expression in human angiotensin  
68 converting enzyme 2 (K18-hACE2) from mortality. Moreover, ATV reduced virus-induced inflammation and cell  
69 death in bronchoalveolar lavage (BAL), and lung damage in infected and treated animals. This study compiles pre-  
70 clinical results that may allow further rationalization of clinical trials against COVID-19.

71

## 72 2. Materials and Methods

### 73 2.1. General materials

74 Carboxymethyl cellulose (CMC), *tris*(4-(dimethylamino)phenyl)methylum chloride (crystal violet), formalde-  
75 hyde, hematoxylin, eosin, phosphate buffer solution (PBS), ethanol, dimethyl sulfoxide (DMSO), ketamine, xylazine,  
76 trisodium citrate, calcium chloride ( $CaCl_2$ ), and remdesivir (RDV) were purchased from Sigma-Aldrich/Merck (St.  
77 Louis, MO, USA). Atazanavir sulfate (ATV) was kindly donated from *Instituto de Tecnologia de Farmacos*,  
78 Farmanguinhos, Rio de Janeiro, Brazil.

### 79 2.2. Cells and virus

80 African green monkey kidney (Vero, subtype E6) and human lung epithelial (Calu-3) cells were cultured in  
81 high-glucose Dulbecco's modified Eagle medium (DMEM - HyClone, Logan, Utah) supplemented with 100 U/mL  
82 penicillin, 100  $\mu$ g/mL streptomycin (P/S - Thermo Fisher Scientific®, Massachusetts, USA), and 10% fetal bovine se-  
83 rum (FBS - HyClone, Logan, Utah). The cells were incubated at 310K in 5 % of carbon dioxide ( $CO_2$ ).

84 The SARS-CoV-2 B.1 lineage (GenBank #MT710714) and gamma variant (also known as P1 or B.1.1.28 lineage;  
85 #EPI\_ISL\_1060902) were isolated on Vero E6 cells from nasopharyngeal swabs of confirmed cases. All procedures  
86 related to virus culture were handled at biosafety level 3 (BSL3) multiuser facility at *Fundação Oswaldo Cruz* (Fiocruz),  
87 Rio de Janeiro, Brazil, according to World Health Organization (WHO) guidelines [14].

### 88 2.3. Enzymatic assays

89 The ATV capacity to inhibit enzymatic velocity of  $PL^{pro}$  and  $M^{pro}$  from SARS-CoV-2 was determined by the  
90 commercial kit provided by BPS Bioscience® company (catalog number: #79995-1 and #79955-1, respectively) follow-  
91 ing the procedure and recommendations from literature and manufacturer [15-17]. Basically, 100 nM  $PL^{pro}$  was incu-  
92 bated in 50 mM HEPES pH 7.4, 0.01% Triton X-100 (v/v), 0.1 mg/mL bovine serum albumin (BSA), 2 mM dithiothreitol  
93 (DTT) with 25  $\mu$ M of its substrate (modified peptide Z-RLRGG-AMC with CAS number 167698-69-3) in the presence  
94 various concentrations (0-10  $\mu$ M of ATV or GRL0617 (positive control) for 45-60 minutes. On the other hand, 88.8 nM

95 M<sup>pro</sup> was incubated overnight in reaction buffer (20 mM Tris pH 7.3, 100 mM NaCl, 1 mM EDTA, 1 mM DTT, and 1  
96  $\mu$ M BSA) containing 25  $\mu$ M of substrate (modified peptide DABCYL-KTSAVLQSGFRKME-EDANS with CAS number  
97 730985-86-1) and ATV or boceprevir (GC376, positive control), at concentrations ranging from 0 to 10  $\mu$ M. Fluores-  
98 cence signal was measured at an emission wavelength of 460 nm with excitation at 360 nm in a GloMax® (Promega)  
99 plate reader. Morrison's inhibitory constant ( $K_i$ ) was calculated by non-linear regression using GraphPad Prism 9. The  
100 Michaelis-Menten plot was conducted for 88.8 nM M<sup>pro</sup> incubated overnight in assay buffer with substrate concentra-  
101 tions varying from 0 to 100  $\mu$ M in the presence and absence of 2.5  $\mu$ M of ATV. After fluorescence quantification, the  
102 Michaelis-Menten constant ( $K_m$ ) and maximum velocity ( $V_{max}$ ) were calculated by non-linear regression using  
103 GraphPad Prism 9. The value was presented as mean  $\pm$  standard deviation (SD).

#### 104 2.4. Molecular docking procedure

105 The crystallographic structure of M<sup>pro</sup> was obtained from Protein Data Bank (PDB), with access code 7K40 [18].  
106 The chemical structure for ATV was built and minimized in terms of energy by Density Functional Theory (DFT) via  
107 Spartan'18 software (Wavefunction, Inc., Irvine, CA, USA) [19]. The molecular docking calculations were performed  
108 with GOLD 2020.2 software (Cambridge Crystallographic Data Center Software Ltd., CCDC, CB2 1EZ, UK) [20]. Hy-  
109 drogen atoms were added to the protease following tautomeric states and ionization data, which are inferred by the  
110 GOLD 2020.2 software at pH 7.4. The number of genetic operations (crossing, migration, mutation) during the search  
111 procedure was set as 100,000. Redocking studies were carried out with the crystallographic ligand boceprevir (GC376,  
112 PDB code: 7K40), obtaining the lowest root mean square deviation (RMSD) value by ChemPLP function. It was de-  
113 fined 8  $\text{\AA}$  radius around the active binding site and the figures were generated with PyMOL Delano Scientific LLC  
114 software (DeLano Scientific LLC: San Carlos, CA, USA) [21].

#### 115 2.5. Yield-reduction assays and virus titration

116 Calu-3 cells ( $2.0 \times 10^5$  cells/well) were infected with multiplicity of infection (MOI) of 0.1 and 0.001 for SARS-  
117 CoV-2 B.1 lineage and MOI of 0.1 for SARS-CoV-2 gamma strain. Infection was performed in 96-well plates (Nalge  
118 Nunc Int, Rochester, New York, USA) for 1 h at 37°C in 5 % of CO<sub>2</sub>. Inoculum was removed and cells were incubated  
119 different concentrations of ATV (0.00, 0.60, 1.25, 2.50, 5.00, and 10.0  $\mu$ M) or RDV (0.00, 0.0001, 0.001, 0.01, 0.10, 0.50,  
120 1.0, 5.0, and 10.0,  $\mu$ M) in DMEM with 10% FBS. After 48 h, the supernatants were harvested, and infectious virus titers  
121 were quantified by plaque forming assays according to previous publications [7,22,23].

122 To perform the virus titration, Vero cells ( $2.0 \times 10^4$  cell/well) in 96-well plates (Nalge Nunc Int, Rochester, New  
123 York, USA) were infected with log-based dilutions of the yield reduction assays' supernatants for 1 h at 37°C in 5% of  
124 CO<sub>2</sub>. After the incubation, medium containing 1.8% CMC with 5% FBS was added and incubated at 37°C with 5% CO<sub>2</sub>  
125 for 72 h. The cells were fixed with 10% formaldehyde in PBS and stained with a 0.04% solution of crystal violet in 70%  
126 methanol. The virus titers were calculated by scoring the plaque-forming unit – (PFU/mL) and a non-linear regression  
127 analysis of the dose-response curves was also performed to calculate the 50% effective concentration (EC<sub>50</sub>). All exper-  
128 iments were carried out at least three independent times, including a minimum of two technical replicates in each  
129 assay, and each data was analyzed from Prism GraphPad software 8.0 (Windows GraphPad Software, San Diego,  
130 California USA). The value was presented as mean  $\pm$  standard deviation (SD).

#### 131 2.6. Cytotoxic assays

132 Vero cells ( $2.0 \times 10^4$  cell/well) were treated for 3 days with different concentrations of ATV or RDV (ranging  
133 from 1 to 600  $\mu$ M) as previously described by us [7,23]. The 50% cytotoxic concentration (CC<sub>50</sub>) was calculated by a  
134 non-linear regression analysis from a dose–response curve. All experiments were carried out at least three independ-  
135 ent times and each data was analyzed from Prism GraphPad software 8.0 (Windows GraphPad Software, San Diego,  
136 California USA). The results were presented as mean  $\pm$  standard deviation (SD). The selectivity indexes (SI) for ATV  
137 and RDV were calculated through the ratio between CC<sub>50</sub> and EC<sub>50</sub> values.

#### 138 2.7. Pharmacokinetic assays

139 ATV's concentration in the plasma and lungs of adult Swiss-Webster mice (8-15 weeks) was evaluated over  
140 time. Animals were treated with an oral dose of 60 mg/kg of ATV for 12-time intervals - 00:05, 00:10, 00:20, 00:40,  
141 01:00, 02:00, 03:00, 04:00, 06:00, 08:00, 10:00, and 12:00h. Each treatment group had 5 animals. After these periods of  
142 times, total blood and lungs were collected. Plasma was obtained by blood centrifugation at 8,000  $\times$  g for 15 minutes.

143 Time zero was obtained by analyzing the matrix pool (blood plasma) of untreated animals. The pharmacokinetic pa-  
144 rameters of half-life ( $t_{1/2}$ , h), time until maximum concentration is reached ( $t_{max}$ , h), maximum compound concentration  
145 ( $C_{max}$ , ng/mL), and area under the curve (AUC, h.ng/mL) were determined. The experiments performed in this section  
146 were approved by the Committee on the Use of Laboratory Animals of the Oswaldo Cruz Foundation (CEUA-  
147 FIOCRUZ, license L003/21).

#### 148 2.8. *In vivo* assays – Mice treatment and infections

149 Experiments with transgenic mice expressing human ACE-2 receptor (K18-hACE2- mice), were performed in  
150 Animal Biosafety Level 3 (ABSL-3) multiuser facility, according to the animal welfare guidelines of the Ethics Com-  
151 mittee of Animal Experimentation (CEUA-INCa, License 005/2021) and WHO guidelines [14]. The animals were ob-  
152 tained from the Oswaldo Cruz Foundation breeding colony and maintained with free access to food and water at 29–  
153 30°C under a controlled 12 h light/dark cycle. Experiments were performed during the light phase of the cycle.

154 For infection procedures, mice were anaesthetized with 60 mg/kg of ketamine and 4 mg/kg of xylazine and in-  
155 oculated intranasally with DMEM high glucose (MOCK), or  $10^5$  PFU of SARS-CoV-2 gamma strain in 10  $\mu$ l of DMEM  
156 high glucose. It was used 6 mice per experimental group: MOCK (non-infected); SARS-CoV-2-infected without treat-  
157 ment (NIL) and SARS-CoV-2-infected and treated with ATV. The animals were treated with a daily dose of 60 mg/kg  
158 of ATV for seven days.

159 The animals were monitored daily during seven days for survival and body-weight analysis. In the case of  
160 weight loss higher than 20% euthanasia was performed to alleviate animal suffering. In the last day, the  
161 bronchoalveolar lavage (BAL) from both lungs was harvested by washing the lungs once with 1 mL of cold PBS. After  
162 centrifugation of BAL (1500 rpm for 5 minutes), the pellet was used for total and differential leukocytes counts (dilu-  
163 ted in Turk's 2% acetic acid fluid) using a Neubauer chamber. The lactate dehydrogenase (LDH) quantification was  
164 performed with centrifuged BAL supernatant to evaluated cell death (CytoTox96, Promega, USA). Differential cell  
165 counts were performed by cytopsin (Cytospin3; centrifugation of 350xg for 5 minutes at room temperature) and  
166 stained by the May-Grünwald-Giemsa method.

167 After BAL harvesting, lungs were perfused with 20 mL of saline solution to remove the circulating blood. Lungs  
168 were then collected, potted, and homogenized in 500  $\mu$ L of a phosphatase and protease inhibitor cocktail Complete,  
169 mini EDTA-free Roche Applied Science (Mannheim, Germany) for 30 sec, using an Ultra-Turrax Disperser T-10 basic  
170 IKA (Guangzhou, China).

#### 171 2.9. Quantification of viral RNA

172 The viral RNA from samples collected in the *in vivo* assays was quantified through quantitative reverse tran-  
173 scription polymerase chain reaction (RT-PCR). Total RNA was extracted using QIAamp Viral RNA (Qiagen), accord-  
174 ing to manufacturer's instructions. Quantitative RT-PCR was performed using Quanti Tect Probe RT-PCR Kit  
175 (Qiagen) in a StepOne Plus™ Real-Time PCR System (Thermo Fisher Scientific). Amplifications were carried out in 15  
176  $\mu$ L reaction mixtures containing 2 $\times$  reaction mix buffer, 50  $\mu$ M of each primer, 10  $\mu$ M of the probe, and 5  $\mu$ L of RNA  
177 template. Primers, probes, and cycling conditions recommended by the Centers for Disease Control and Prevention  
178 (CDC) protocol were used to detect the SARS-CoV-2 (CDC 2020). Amplification of the housekeeping gene glyceralde-  
179 hyde-3-phosphate dehydrogenase (GAPDH) was used as a reference for the number of cells. The cycle threshold (CT)  
180 values for this target were compared to those obtained with different cell quantities ( $10^7$  to  $10^2$ ), for calibration.

#### 181 2.10. Measurements of inflammatory mediators and cell death

182 The levels of IL-6, TNF- $\alpha$ , KC, and PF4 were quantified in BAL samples from uninfected (MOCK), infected  
183 without treatment (NIL), and infected and treated animals by ELISA, using specific kits and following the manufac-  
184 turer's instructions (R&D Systems). Cell death was determined according to the activity of LDH in the BAL as previ-  
185 ously described in the section 2.7.

#### 186 2.11. Histological procedure

187 Histological features related to the injury caused by SARS-CoV-2 infection were analyzed in the lungs of K18-  
188 hACE2 mice. Inflammatory and vascular infiltrates and evidence of cell degeneration was evaluated to characterize  
189 the level of the tissue damage. The collected material was fixed with formaldehyde (4%), dehydrated and embedded  
190 in paraffin to the obtention of tissue slices through the use of a microtome. The slices were fixed and stained with  
191 hematoxylin and eosin for microphotographs analysis.

## 192 2.12. Clotting time

193 Human blood samples were collected from healthy donors in 3.8% trisodium citrate (9:1, v/v), and platelet-poor  
 194 plasma was obtained by centrifugation at 3,000 rpm for 10 min. Plasma (100  $\mu$ L) was incubated with 1  $\mu$ L of ATV at  
 195 various concentrations (diluted in DMSO) for 2 min at 310K. Plasma clotting was initiated by the addition of 100  $\mu$ L of  
 196 25 mM  $\text{CaCl}_2$ , and the time for clot formation was recorded on a KC-4 Delta coagulometer (Tcoag, Ireland). Time for  
 197 clot formation was recorded in triplicates.

## 198 3. Results

### 199 3.1. Enzymatic and cell-based assays for ATV in SARS-CoV-2 D614G and gamma strains

200 To advance on details on how ATV inhibits SARS-CoV-2  $M^{\text{pro}}$ , we initially performed a dose-dependent inhibi-  
 201 tion curve. ATV was slightly less potent than the positive control boceprevir (GC376) [24] (Figure 1A). The Morrison's  
 202 inhibitory constant ( $K_i$ ) values for GC376 and ATV were  $208 \pm 0.15$  and  $703 \pm 79$  nM, respectively. Next, we tested  
 203 ATV against various concentrations of  $M^{\text{pro}}$  substrate. We observed that maximum velocity ( $V_{\text{max}}$ ) values in the pres-  
 204 ence and absence of ATV were not different, while the Michaelis-Menten constant ( $K_m$ ) values increased significantly  
 205 in the presence of this drug (Figure 1B), indicating a competitive inhibition profile. Our results are specific to  $M^{\text{pro}}$   
 206 because, differently from the positive control GRL0617, ATV did not inhibit SARS-CoV-2 papain-like protease ( $PL^{\text{pro}}$ )  
 207 (Figure 1C). Since structural improvements on the  $M^{\text{pro}}$  active site were determined more recently [25,26], SARS-CoV-  
 208 2 molecular docking calculations were carried out to test if a catalytic water ( $\text{H}_2\text{O}_{\text{cat}}$ ) was required for ATV action.  
 209 Since the highest docking score value was obtained in the presence of  $\text{H}_2\text{O}_{\text{cat}}$ , molecular docking calculation suggested  
 210 a dependence of ATV potency of water content into the catalytic site of  $M^{\text{pro}}$  (Figure 1D).

211 The competitive inhibition implies that  $M^{\text{pro}}$ 's substrate concentration may affect its susceptibility to ATV. Thus,  
 212 we tested if ATV's potency is also affected in type II pneumocyte cell line (Calu-3) infected with different SARS-CoV-2  
 213 MOIs. In cell-based assays, the intracellular concentration of  $M^{\text{pro}}$ 's substrate would be proportional to the virus input.  
 214 Indeed, ATV's  $\text{EC}_{50}$  value for the SARS-CoV-2 B.1 lineage varied in a MOI-dependent way (Table 1), similarly to  
 215 remdesivir (RDV) (Table 1), a competitive inhibitor of the SARS-CoV-2 RNA polymerase complex under clinical use  
 216 [27,28]. The SARS-CoV-2 gamma VoC is more susceptible to ATV and RDV than its predecessor strain B.1 (Table 1).  
 217 Since the  $\text{CC}_{50}$  values of  $312 \pm 8$  and  $512 \pm 30$   $\mu\text{M}$  for ATV and RDV, respectively, their selective index (SI) values were  
 218 consistent with an adequate safety profile *in vitro* (Table 1).

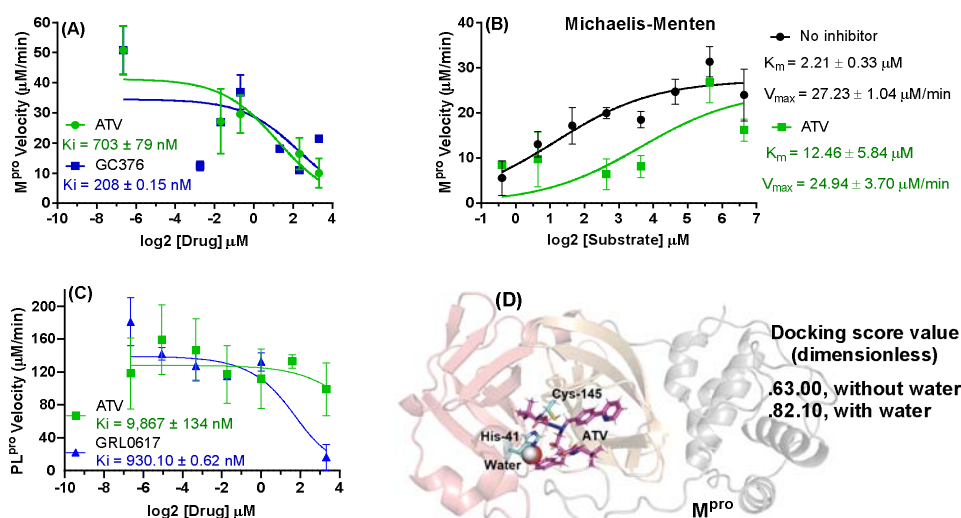

219

220 **Figure 1.** (A) The ATV and boceprevir (GC376, positive control) activity on 88.8 nM  $M^{\text{pro}}$  velocity at 0-10  $\mu\text{M}$  of inhibitor (protease  
 221 assay kit #79955-1, BPS Biosciences, USA). (B) Michaelis-Menten plot for 88.8 nM  $M^{\text{pro}}$  incubated overnight in assay buffer with  
 222 substrate concentrations from 0 to 100  $\mu\text{M}$  in the presence and absence of 2.5  $\mu\text{M}$  of ATV. (C) The ATV and GRL-617 (positive control)  
 223 activity on 100 nM  $PL^{\text{pro}}$  velocity at 0-10  $\mu\text{M}$  of inhibitor (protease assay kit #79995-1, BPS Biosciences, USA). (D) The 3D repre-  
 224 sentation of the best docking pose for ATV into  $M^{\text{pro}}$  catalytic site in the presence of the catalytic water ( $\text{H}_2\text{O}_{\text{cat}}$ ) obtained with  
 225 GOLD 2020.2 software (Cambridge Crystallographic Data Centre, Cambridge, CB2 1EZ, UK) using ChemPLP as scoring function.  
 226 For better interpretation the  $M^{\text{pro}}$  structure was represented only in the monomeric form with the domains I, II, and III in light red,

227 orange, and gray, respectively. The ATV and catalytic amino acid residues are in stick representation in pink and cyan, respective-  
 228 ly, while H<sub>2</sub>O<sub>cat</sub> is represented as sphere.

229

230 **Table 1.** *In vitro* pharmacological parameters for ATV and RDV against SARS-CoV-2 variants in Calu-3 cells.

| Strain                 | MOI   | ATV                   |                       |     | RDV                   |                       |       |
|------------------------|-------|-----------------------|-----------------------|-----|-----------------------|-----------------------|-------|
|                        |       | EC <sub>50</sub> (μM) | CC <sub>50</sub> (μM) | SI  | EC <sub>50</sub> (μM) | CC <sub>50</sub> (μM) | SI    |
| B.1                    | 0.1   | 0.490 ± 0.020         | 312 ± 8               | 637 | 0.461 ± 0.038         | 512 ± 30              | 1,111 |
| B.1                    | 0.001 | 0.321 ± 0.016         | 312 ± 8               | 972 | 0.225 ± 0.019         | 512 ± 30              | 2,276 |
| P1 (formally B.1.1.28) | 0.1   | 0.399 ± 0.020         | 312 ± 8               | 782 | 0.113 ± 0.010         | 512 ± 30              | 4,530 |

231

### 232 3.2. *In vivo* antiviral activity of ATV against SARS-CoV-2 gamma variant

233 We first aimed evaluate ATV's pharmacokinetics profile over time in the plasma and lungs of Swiss-Webster  
 234 mice treated with 60 mg/kg of this drug, a dosage equivalent to its plasma exposure in humans under treatment  
 235 against HIV. Upon treatment with 60 mg/kg, ATV concentration in the plasma was similar to the standard treatment  
 236 of 300 mg in humans (Figure 2A) [29]. Interestingly, ATV seems to be concentrated in the lung of the treated animals  
 237 (Figure 2B).

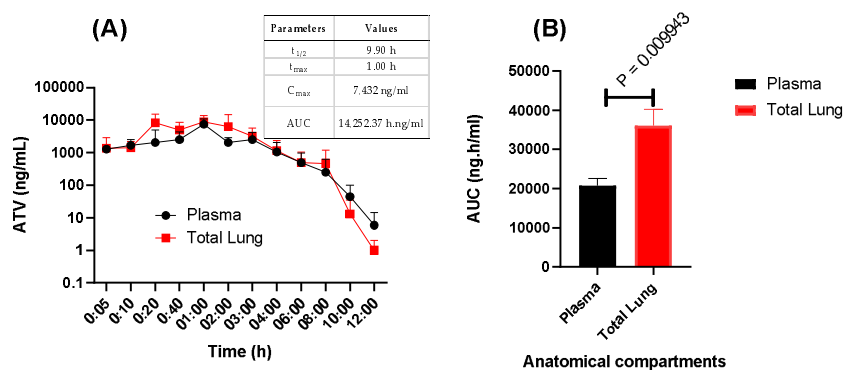

238

239 **Figure 2.** Pharmacokinetics of atazanavir (ATV) in mice. Swiss-Webster mice at 8-15 weeks of age were orally treated with 60  
 240 mg/kg of ATV. (A) At indicated time points, concentration of ATV was measured in the plasma and in the lungs. The insert in  
 241 panel A represents the pharmacokinetic parameters in the plasma. (B) The area under the curve (AUC) for the anatomical com-  
 242 partments were registered.

243

244 Next, we infected K18-hACE2-transgenic mice with SARS-CoV-2 gamma VoC and treated them with a daily  
 245 oral dose of 60 mg/kg ATV, initiating 12h after infection. Whereas the infection kills all animals within 6 days, a statis-  
 246 tically significant increase in animal survival was observed in the infected and ATV-treated mice (Figure 3A). ATV  
 247 protected the mice to continue to lose weight at the 6<sup>th</sup> day after infection (Figures 3B). In the bronchoalveolar lavage  
 248 (BAL) of the treated animals, ATV significantly decreased SARS-CoV-2 RNA levels (Figure 3C), cell death - based on  
 249 lactate dehydrogenase (LDH) activity (Figure 3D), and cell-based inflammation – based on cells counts of  
 250 polymorphonuclear and mononuclear cells (Figure 3E and F).

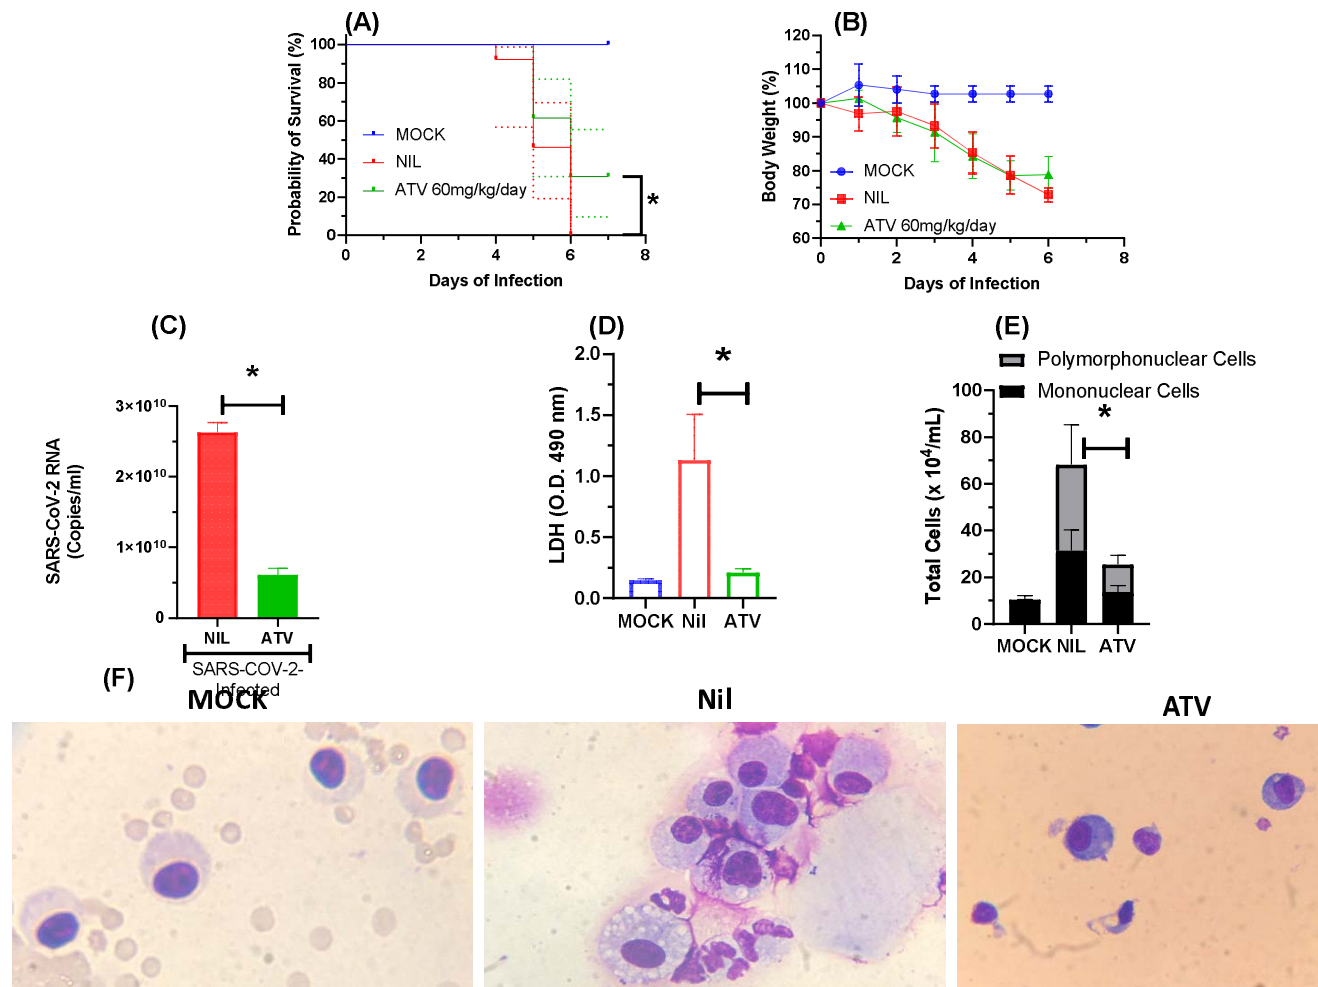

251 **Figure 3. ATV protected K18-hACE2-transgenic mice infected with SARS-CoV-2 from mortality.** The survival (A), and  
 252 weight variation (B) of the different experimental groups: non-infected and non-treated (MOCK) or SARS-CoV-2-  
 253 infected and non-treated (NIL) SARS-CoV-2-infected and treated with ATV. After 12h of infection the treated group re-  
 254 ceived the first of a daily dose of 60 mg/kg of ATV. The animals were treated for six days. Survival was statistically as-  
 255 sessed by Log-rank (Mantel-Cox) test, where \*  $p < 0.05$ . The viral load (C), LDH levels (D), polymorphonuclear and  
 256 mononuclear cells counts (E) and immunocytochemical staining (F) were assessed in the BAL six days after infection in  
 257 the indicated experimental groups. All the analysis were performed with 6 mice/group.

258 ATV reduced the SARS-CoV-2-induced IL-6 levels in the BAL and in the lungs of treated animals (Figure 4). In  
 259 the lung, levels of TNF- $\alpha$  and KC were also reduced in the infected/untreated over untreated mice (Figure 4). These  
 260 results are in line with our previous description that ATV decreases the levels of SARS-CoV-2-induced pro-  
 261 inflammatory cytokines in monocytes [7] and virus-triggered pyroptosis [30]. Moreover, SARS-CoV-2 infection pro-  
 262 voked severe lung injury, leading to hemorrhage, and shrinking of the lobe, bronchiole, and alveoli (Figure 5), which  
 263 was reduced by ATV. This protection is the consequence of the direct antiviral and anti-inflammatory activity of ATV,  
 264 since this molecule could not prevent hemorrhage as an anti-clotting agent (Figure S1, Supplementary Material).

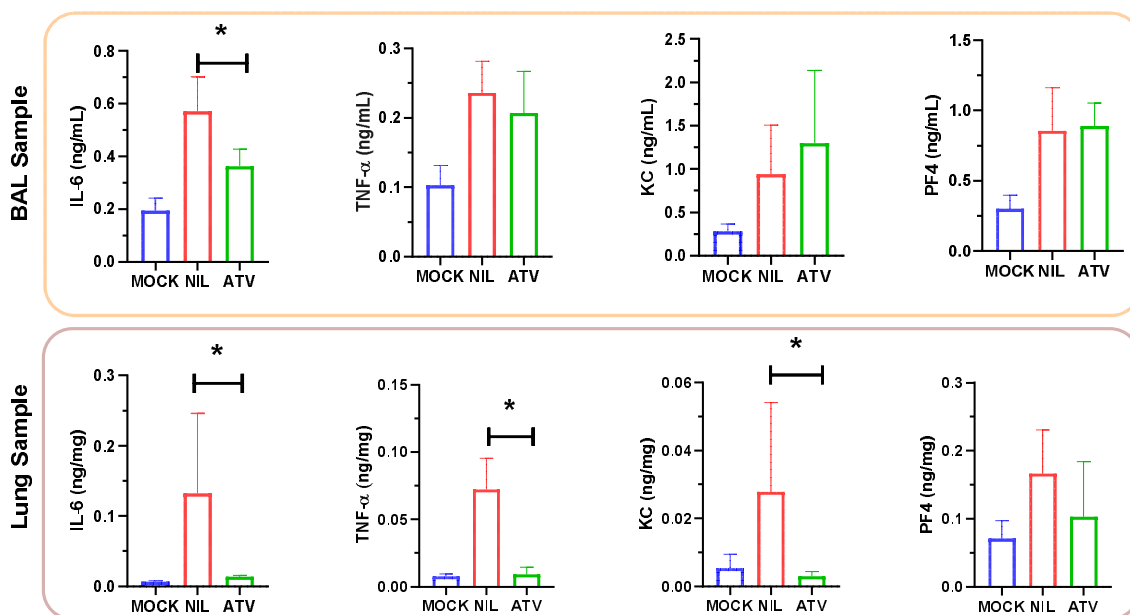

**Figure 4.** The proinflammatory content in terms of cytokines IL-6, TNF- $\alpha$ , KC, and PF4 in BAL and lung samples. \*  $p < 0.05$

265  
266  
267

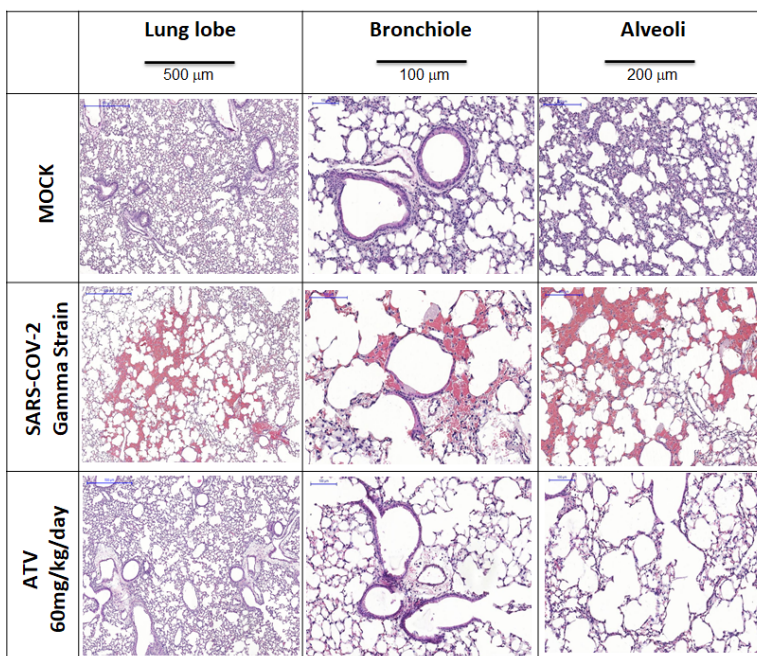

268

**Figure 5.** Microphotographs for histology of lung lobe, bronchiole, and alveoli samples from K18-hACE2-transgenic mice non-infected (MOCK) and infected with SARS-CoV-2 gamma strain without (NIL) and treated with ATV upon the six treated days.

#### 271 4. Discussion

272 Repurposing of clinically approved drugs was considered an accelerated strategy to combat SARS-CoV-2 infec-  
273 tions [31,32]. However, limited clinical benefit has been documented for most repurposed drugs, whereas in the  
274 meantime orally available antiviral drugs against COVID-19 demonstrated clinical efficacy to reduce hospitalization,  
275 such as molnupiravir [33] and PAXLOVID™ [12]. Molnupiravir and PAXLOVID™ respectively target the viral RNA  
276 synthesis and M<sup>Pro</sup>. Besides detailed mechanism of action, these compounds fulfilled pre-clinical steps of investigation,  
277 from cell-based to animal models, to allow further clinical development to be conducted at target plasmatic concentra-



278 tion. Here, we performed these steps for ATV. The comprehension that ATV inhibits competitively  $M^{pro}$  and requires  
279 a catalytic water may allow further development of anti-SARS-CoV-2 analogs, that act differently than PAXLOVID™,  
280 a covalent inhibitor of  $M^{pro}$  by interaction with the catalytic cysteine (Cys-145) residue [34].

281 We originally demonstrated that ATV inhibited SARS-CoV-2  $M^{pro}$  preparations and virus replication [7]. The  
282 controversial effects of ATV on SARS-CoV-2  $M^{pro}$  are documented in the literature [10,12]. In line with studies that  
283 demonstrated SARS-Cov-2 susceptibility to ATV, we demonstrated here that  $M^{pro}$  was inhibited by this drug, with  $K_i$   
284 1.5-fold higher than boceprevir (GC376) and in a competitive fashion, increasing the enzyme's  $K_m$  more than 6-fold. It  
285 is unlikely that the other SARS-CoV-2 protease,  $PL^{pro}$ , was targeted by ATV in these assays, because its  $K_i$  for  $PL^{pro}$   
286 was above the threshold of *in vitro* inhibition.

287 The amino acid residue His-41 of  $M^{pro}$  requires water to catalyze proteolytic cleavage [25,26] and ATV targets  
288 this moiety. The presence of 20% glycerol in enzyme assay mixture reduces the water content and prevents ATV activ-  
289 ity, that is why Ma and Wang [13,35] could not identify this HIV protease inhibitor as a potential antiviral against  
290 COVID-19 - whereas Li et al. [10] reached results similarly to ours. Our enzymatic assay includes bovine serum albu-  
291 min (BSA) to avoid non-specific binding of small molecules to  $M^{pro}$ . In our  $M^{pro}$  FRET-based enzymatic assay, reac-  
292 tions were allowed to occur overnight to increase the sensitivity, instead of 1h [13]. Although one might argue that a  
293 longer reaction time will increase the rate of false positive results, the following cell-based assays provide an addi-  
294 tional layer of evidence that ATV activity against SARS-CoV-2 is credible.

295 Considering the substrate-dependent inhibitory effect of ATV, we hypothesized ATV's potency in cell-based as-  
296 says would be influenced by varying the virus input, because higher numbers of virus particles should translate into  
297 increased quantities of  $M^{pro}$  substrate. To test this hypothesis, Calu-3 cells, which is more closely resemble type II  
298 pneumocytes than A549 and Vero cells [36], were infected with a 100-fold different multiplicity of infections (MOI) of  
299 SARS-CoV-2, B.1 lineage, and treated with ATV or RDV, a competitive inhibitor of viral RNA synthesis. The MOI-  
300 dependent inhibition was consistent for ATV and RDV. The similarity in the cell-based potency of ATV to its  $K_i$  for  
301  $M^{pro}$  further reinforces the conclusion that  $M^{pro}$  is the target of ATV *in vitro*.

302 The emerging Brazilian SARS-CoV-2 gamma variant, initially detected in the state of Amazonas, was responsi-  
303 ble for a public health calamity, spreading rapidly in Brazil and considered as one of variant of concern by WHO. The  
304 mutations found in gamma variant have been associated with increased transmissibility, higher viral load, propensity  
305 for immune evasion, and SARS-CoV-2 reinfection [37,38]. ATV presented adequate inhibitory profile against the pre-  
306 decessor strain of SARS-CoV-2 and also the gamma variant *in vitro*. Based on that and considering the lethality of  
307 gamma variant on K-18 mice model, we next performed *in vivo* experiments.

308 At plasma exposures similar to humans [29], ATV enhanced by 30% the survival of K18-hACE2-transgenic mice  
309 infected with SARS-CoV-2 gamma strain and decreased virus-induced cell death and inflammation. Despite there is  
310 not a statical difference in the body weight between the untreated and treated groups, the protective effect of ATV  
311 was viewed in relation to the significantly decrease of SARS-CoV-2 RNA levels in the bronchoalveolar lavage (BAL),  
312 as well as a significant reduction in the number of mononuclear leukocytes, polymorphonuclear leukocytes and LDH  
313 levels. In the BAL infected and treated animals displayed lower levels of IL-6, TNF- $\alpha$ , KC and PF4, compared to un-  
314 treated mice. The *in vivo* anti-inflammatory of ATV observed here is in line with the ability of this molecule to inhibit  
315 pyroptosis in human primary monocytes for both BAL and lung samples clearly showing that ATV protect both cell  
316 death and inflammation [39].

317 Our study shows that ATV inhibits SARS-COV-2  $M^{pro}$  with a mechanism of action different than PAXLOVID™,  
318 showing ATV/ $M^{pro}$  interface could give insights for further drug development. The *in vitro* and *in vivo* results recon-  
319 firm, in different magnitudes, SARS-CoV-2 susceptibility to ATV. Further ongoing clinical trials will determine if  
320 standard dose, used in HIV-treatment can prevent severe COVID-19 or if it is necessary higher doses [40]. According  
321 to ATV's monography [29], doses three times higher could be used for shorter periods of time, when compared to the  
322 life-lasting HIV treatment.

323  
324 **Author Contributions:** Conceptualization, T.M.L.S. and P.T.B.; methodology, O.A.C., C.Q.S., A.C.F., M.M., N.F.-R., J.R.T.,  
325 and T.M.L.S.; software, O.A.C.; validation, O.A.C., T.M.L.S., R.Q.M., P.T.B., H.C.C.-F.-N., and J.P.B.V.; formal analysis, O.A.C.,  
326 C.Q.S., A.C.F., M.M., N.F.-R., J.R.T., D.P.P., G.P.E.S., L.B.F., H.M.P., A.S.C., J.C.d'Ávila, L.V., and R.Q.M.; investigation, O.A.C.,  
327 T.M.L.S., C.Q.S., A.C.F., M.M., N.F.-R., and J.R.T.; resources, T.M.L.S., J.P.B.V., P.T.B., and H.C.C.-F.-N.; data curation, O.A.C. and  
328 T.M.L.S.; writing—original draft preparation, O.A.C. and T.M.L.S.; writing—review and editing, O.A.C., T.M.L.S., C.Q.S., A.C.F.,  
329 M.M., N.F.-R., J.R.T., R.Q.M., J.P.B.V., and H.C.C.-F.-N.; visualization, O.A.C. and T.M.L.S.; supervision, T.M.L.S., R.Q.M., J.P.B.V.,  
330 P.T.B., and H.C.C.-F.-N.; project administration, T.M.L.S.; funding acquisition, T.M.L.S., J.P.B.V., P.T.B., and H.C.C.-F.-N. All au-  
331 thors have read and agreed to the published version of the manuscript.

332 **Funding:** The project was financially supported by Conselho Nacional de Desenvolvimento Científico e Tecnológico (CNPq), and  
333 Fundação Carlos Chagas Filho de Amparo à Pesquisa do Estado do Rio de Janeiro (FAPERJ). This study was financed in part by  
334 Coordenação de Aperfeiçoamento de Pessoal de Nível Superior (CAPES, Brazil) with finance code 001.

335 **Institutional Review Board Statement:** The *in vivo* studies were conducted according to the both guidelines of Committee on the  
336 Use of Laboratory Animals of the Oswaldo Cruz Foundation (CEUA-FIOCRUZ) with license L003/21 approved in 01/04/2020 and  
337 to the animal welfare guidelines of the Ethics Committee of Animal Experimentation from National Cancer Institute of Brazil  
338 (CEUA-INCA) with license 005/2021 approved in 03/05/2021.

339 **Informed Consent Statement:** Not applicable.

340  
341 **Acknowledgments:** The authors acknowledgement the funding Brazilian agencies CNPq, Faperj, and CAPES and also Dra. Patricia  
342 Machado Rodrigues e Silva Martins and Dra Tatiana Paula Teixeira Ferreira from Fiocruz for the microphotographs analysis.  
343 O.A.C. also thanks Dr. Dumith Chequer Bou-Habib and *Fundação para o Desenvolvimento Científico e Tecnológico em Saúde* (FIOTEC)  
344 both from Oswaldo Cruz Foundation for the grant VPPCB-005-FIO-20.

345 **Conflicts of Interest:** The authors declare no conflict of interest and the funders had no role in the design of the study; in the collec-  
346 tion, analyses, or interpretation of data; in the writing of the manuscript, or in the decision to publish the results.

## 347 References

- 348 1. Chaplin, S. COVID-19: A brief history and treatments in development. *Prescriber* **2020**, *31*, 23-28. [[CrossRef](#)]
- 349 2. Liu, Y.-C.; Kuo, R.-L.; Shih, S.-R. COVID-19: The first documented coronavirus pandemic in history. *Biom. J.* **2020**, *43*, 328-333.  
350 [[CrossRef](#)]
- 351 3. WHO Coronavirus (COVID-19) Dashboard. Available online: <https://covid19.who.int/> (accessed on 06/11/2021)
- 352 4. Tregoning, J.S.; Flight, K.E.; Higham, S.L.; Wang, Z.; Pierce, B.F. Progress of the COVID-19 vaccine effort: Viruses, vaccines  
353 and variants versus efficacy, effectiveness and escape. *Nat. Rev. Immunol.* **2021**, *21*, 626-636. [[CrossRef](#)]
- 354 5. Venkatesan, P. Repurposing drugs for treatment of COVID-19. *Lancet* **2021**, *9*, E63. [[CrossRef](#)]
- 355 6. Wood, R. Atazanavir: its role in HIV treatment. *Expert Rev. Anti Infect. Ther.* **2008**, *6*, 785-796. [[CrossRef](#)]
- 356 7. Fintelman-Rodrigues, N.; Sacramento, C.Q.; Lima, C.R.; da Silva F.S.; Ferreira, A.C.; Mattos, M.; de Freitas, C.S.; Soares, V.C.;  
357 Dias, S.S.G.; Temerozo, J.R.; Miranda, M.D.; Matos, A.R.; Bozza, F.A.; Carels, N.; Alves, C.R.; Siqueira, M.M.; Bozza, P.T.; Sou-  
358 za, T.M.L. Atazanavir, alone or in combination with ritonavir, inhibits SARS-CoV-2 replication and proinflammatory cytokine  
359 production. *Antimicrob. Agents Chemother.* **2020**, *64*, e00825-20. [[CrossRef](#)]
- 360 8. The Nitazoxanide Plus Atazanavir for COVID-19 Study (NACOVID). Available online:  
361 <https://clinicaltrials.gov/ct2/show/NCT04459286> (accessed on 06/11/2021)
- 362 9. NA-831, Atazanavir and Dexamethasone Combination Therapy for the Treatment of COVID-19 Infection (NATADEX). Avail-  
363 able online: <https://clinicaltrials.gov/ct2/show/NCT04452565?term=atazanavir&cond=Covid-19&draw=2&rank=2> (accessed on  
364 06/11/2021)
- 365 10. Li, Z.; Li, X.; Huang, Y.Y.; Wu, Y.; Liu, R.; Zhou, L.; Lin, Y.; Wu, D.; Zhang, L.; Liu, H.; Xu, X.; Yu, K.; Zhang, Y.; Cui, J.; Zhan,  
366 Z.-G.; Wang, X.; Luo, H.-B. Identify potent SARS-CoV-2 main protease inhibitors via accelerated free energy perturbation-  
367 based virtual careening of existing drugs. *Proc. Natl. Acad. Sci. U.S.A.* **2020**, *117*, 27381-27387. [[CrossRef](#)]
- 368 11. Jin, Z.; Du, X.; Xu, Y.; Deng, Y.; Liu, M.; Zhao, Y.; Zhang, B.; Li, X.; Zhang, L.; Peng, C.; Duan, Y.; Yu, J.; Wang, L.; Yang, K.;  
369 Liu, F.; Jiang, R.; Yang, X.; You, T.; Liu, X.; Yang, X.; Bai, F.; Liu, H.; Liu, X.; Guddat, L.W.; Xu, W.; Xiao, G.; Qin, C.; Shi, Z.;  
370 Jiang, H.; Rao, Z.; Yang, H. Structure of Mpro from SARS-CoV-2 and discovery of its inhibitors. *Nature* **2020**, *582*, 289-293.  
371 [[CrossRef](#)]
- 372 12. Pfizer's Novel COVID-19 Oral Antiviral Treatment Candidate Reduced Risk of Hospitalization or Death by 89% in Interim  
373 Analysis of Phase 2/3 Epic-HR Study. [https://www.pfizer.com/news/press-release/press-release-detail/pfizers-novel-covid-19-  
374 oral-antiviral-treatment-candidate](https://www.pfizer.com/news/press-release/press-release-detail/pfizers-novel-covid-19-oral-antiviral-treatment-candidate) (accessed on 23/11/2021)
- 375 13. Ma, C.; Wang, J. Dipyridamole, chloroquine, montelukast sodium, candesartan, oxytetracycline, and atazanavir are not SARS-  
376 CoV-2 main protease inhibitors. *Proc. Natl. Acad. Sci. U.S.A.* **2021**, *118*, e2024420118. [[CrossRef](#)]
- 377 14. Bain, W.; Lee, J.S.; Watson, A.M.; Stitt-Fischer, M.S. Practical guidelines for collection, manipulation and inactivation of  
378 SARS-CoV-2 and COVID-19 clinical specimens. *Curr. Protoc. Cytom.* **2020**, *93*, e77. [[CrossRef](#)]
- 379 15. Weglarz-Tomczak, E.; Tomczak, J.M.; Talma, M.; Burda-Grabowska, M.; Giurg, M.; Brul, S. Identification of ebsele and its  
380 analogues as potent covalent inhibitors of papain-like protease from SARS-CoV-2. *Sci. Rep.* **2020**, *11*, 3640. [[CrossRef](#)]
- 381 16. Morse, J.S.; Lalonde, T.; Xu, S.; Liu, W.R. Learning from the past: Possible urgent prevention and treatment options for severe  
382 acute respiratory infections caused by 2019-nCoV. *ChemBiochem* **2020**, *21*, 730-738. [[CrossRef](#)]
- 383 17. Zhang, L.; Lin, D.; Sun, X.; Curth, U.; Drosten, C.; Sauerhering, L.; Becker, S.; Rox, K.; Hilgenfeld, R. Crystal structure of SARS-  
384 CoV-2 main protease provides a basis for design of improved  $\alpha$ -ketoamide inhibitors. *Science* **2020**, *368*, 409-412. [[CrossRef](#)]
- 385 18. Bafna, K.; Krug, R.M.; Montelione, G.T. Structural similarity of SARS-CoV2 Mpro and HCV NS3/4A proteases suggests new  
386 approaches for identifying existing drugs useful as COVID-19 therapeutics. *ChemRxiv* **2020**. [[CrossRef](#)]
- 387 19. Wavefunction, Inc. Available online: <https://www.wavefun.com/> (accessed on 06/11/2021).
- 388 20. GOLD: Protein-Ligand Docking Software. Available online: [http://www.ccdc.cam.ac.uk/solutions/csd-  
389 discovery/components/gold/](http://www.ccdc.cam.ac.uk/solutions/csd-discovery/components/gold/) (accessed on 06/11/2021)

- 390 21. PyMOL by Schrödinger. Available online: <https://pymol.org/2/> (accessed on 06/11/2021)
- 391 22. Puhl, A.C.; Fritch, E.J.; Lane, T.R.; Tse, L.V.; Yount, B.L.; Sacramento, C.Q.; Fintelman-Rodrigues, N.; Tavella, T.A.; Costa,  
392 F.T.M.; Weston, S.; Logue, J.; Frieman, M.; Premkumar, L.; Pearce, K.H.; Hurst, B.L.; Andrade, C.H.; Levi, J.A.; Johnson, N.J.;  
393 Kisthardt, S.C.; Scholle, F.; Souza, T.M.L.; Moorman, N.J.; Baric, R.S.; Madrid, P.B.; Ekins, S. Repurposing the ebola and mar-  
394 burg virus inhibitors tilorone, quinacrine, and pyronaridine: In vitro activity against SARS-CoV-2 and potential mechanisms.  
395 *ACS Omega* **2021**, *6*, 7454–7468. [[CrossRef](#)]
- 396 23. Sacramento, C.Q.; Fintelman-Rodrigues, N.; Temerozo, J.R.; da Silva, A.P.D.; Dias, S.S.G.; da Silva, C.S.; Ferreira, A.C.; Mattos,  
397 M.; Pão, C.R.R.; de Freitas, C.S.; Soares, V.C.; Hoelz, L.V.B.; Fernandes, T.V.A.; Branco, F.S.C.; Bastos, M.M.; Boechat, N.;  
398 Saraiva, F.B.; Ferreira, M.A.; Jockusch, S.; Wang, X.; Tao, C.; Chien, M.; Xie, W.; Patel, D.; Garzia, A.; Tuschl, T.; Russo, J.J.;  
399 Rajoli, R.K.R.; Pedrosa, C.S.G.; Vitória, G.; Souza, L.R.Q.; Goto-Silva, L.; Guimarães, M.Z.; Rehen, S.K.; Owen, A.; Bozza, F.A.;  
400 Bou-Habib, D.C.; Ju, J.; Bozza, P.T.; Souza, T.M.L. In vitro antiviral activity of the anti-HCV drugs daidatasvir and sofosbuvir  
401 against SARS-CoV-2, the etiological agent of COVID-19. *J. Antimicrob. Chemother.* **2021**, *76*, 1874–1885. [[CrossRef](#)]
- 402 24. Oerlemans, R.; Ruiz-Moreno, A.J.; Cong, Y.; Kumar, N.D.; Velasco-Velazquez, M.A.; Neochoritis, C.G.; Smith, J.; Reggiori F.;  
403 Groves, M.R.; Domling, A. Repurposing the HCV NS3–4A protease drug boceprevir as COVID-19 therapeutics. *RSC Med.*  
404 *Chem.* **2021**, *12*, 370–379. [[CrossRef](#)]
- 405 25. Kneller, D.W.; Phillips, G.; O’Neill, H.M.; Jedrzejczak, R.; Stols, L.; Langan, P.; Joachimiak, A.; Coates, L.; Kovalevsky, A.  
406 Structural plasticity of SARS-CoV-2 3CL Mpro active site cavity revealed by room temperature X-ray crystallography. *Nature*  
407 *Comm.* **2020**, *11*, 3202. [[CrossRef](#)]
- 408 26. Lee, J.; Worrall, L.J.; Vuckovic, M.; Rosell, F.I.; Gentile, F.; Ton, A.-T.; Caveney, N.A.; Ban, F.; Cherkasov, A.; Paetzel, M.;  
409 Strynadka, N.C.J. Crystallographic structure of wild-type SARS-CoV2 main protease acyl-enzyme intermediate with physio-  
410 logical C-terminal autoprocessing site. *Nature Comm.* **2020**, *11*, 5877. [[CrossRef](#)]
- 411 27. Kocic, G.; Hillen, H.S.; Tegunov, D.; Dienemann, C.; Seitz, F.; Schmitzova, J.; Farnung, L.; Siewert, A.; Hobartner, C.; Cramer,  
412 P. Mechanism of SARS-CoV-2 polymerase stalling by remdesivir. *Nat Commun.* **2021**, *12*, 279. [[CrossRef](#)]
- 413 28. Wang, Y.; Zhang, D.; Du, G.; Du, R.; Zhao, J.; Jin, Y.; Fu, S.; Gao, L.; Cheng, Z.; Lu, Q.; Hu, Y.; Luo, G.; Wang, K.; Lu, Y.; Li, H.;  
414 Wang, S.; Ruan, S.; Yang, C.; Mei, C.; Wang, Y.; Ding, D.; Wu, F.; Tang, X.; Ye, X.; Ye, Y.; Liu, B.; Yang, J.; Yin, W.; Wang, A.;  
415 Fan, G.; Zhou, F.; Liu, Z.; Gu, X.; Xu, J.; Shang, L.; Zhang, Y.; Cao, L.; Guo, T.; Wan, Y.; Qin, H.; Jiang, Y.; Jaki, T.; Hayden,  
416 F.G.; Horby, P.W.; Cao, B.; Wang, C. Remdesivir in adults with severe COVID-19: a randomised, double-blind, placebo-  
417 controlled, multicentre trial. *Lancet* **2020**, *395*, 1569–1578. [[CrossRef](#)]
- 418 29. Product Monograph Atazanavir Capsules. Available online:  
419 [https://www.bms.com/assets/bms/ca/documents/productmonograph/REYATAZ\\_EN\\_PM.pdf](https://www.bms.com/assets/bms/ca/documents/productmonograph/REYATAZ_EN_PM.pdf) (accessed on 6/11/2021)
- 420 30. Ferreira, A.C.; Soares, V.C.; de Azevedo-Quintanilha, I.G.; Dias, S.S.G.; Fintelman-Rodrigues, N.; Sacramento, C.Q.; Mattos,  
421 M.; de Freitas, C.S.; Temerozo, J.R.; Teixeira, L.; Hottz, E.D.; Barreto, E.A.; Pão, C.R.R.; Palhinha, L.; Miranda, M.; Bou-Habib,  
422 D.C.; Bozza, F.A.; Bozza, P.T.; Souza, T.M.L. SARS-CoV-2 engages inflammasome and pyroptosis in human primary mono-  
423 cytes. *Cell Death Discov.* **2021**, *7*, 43. [[CrossRef](#)]
- 424 31. Trezza, A.; Lovinelli, D.; Santucci, A.; Prischi, F.; Spiga, O. An integrated drug repurposing strategy for the rapid identifica-  
425 tion of potential SARS-CoV-2 viral inhibitors. *Sci Rep.* **2020**, *10*, 13866. [[CrossRef](#)]
- 426 32. Andrade, B.S.; Rangel, F.S.; Santos, N.O.; Freitas, A.S.; Soares, W.R.A.; Siqueira, S.; Barh, D.; Góes-Neto, A.; Birbrair, A.;  
427 Azevedo, V.A.C. Repurposing approved drugs for guiding COVID-19 prophylaxis: A systematic review. *Front. Pharmacol.*  
428 **2020**, *11*, 590598. [[CrossRef](#)]
- 429 33. Merck and Ridgeback’s Investigational Oral Antiviral Molnupiravir Reduced the Risk of Hospitalization or Death by Approx-  
430 imately 50 Percent Compared to Placebo for Patients with Mild or Moderate COVID-19 in Positive Interim Analysis of Phase 3  
431 Study. [https://www.merck.com/news/merck-and-ridgebacks-investigational-oral-antiviral-molnupiravir-reduced-the-risk-of-](https://www.merck.com/news/merck-and-ridgebacks-investigational-oral-antiviral-molnupiravir-reduced-the-risk-of-hospitalization-or-death-by-approximately-50-percent-compared-to-placebo-for-patients-with-mild-or-moderat/)  
432 [hospitalization-or-death-by-approximately-50-percent-compared-to-placebo-for-patients-with-mild-or-moderat/](https://www.merck.com/news/merck-and-ridgebacks-investigational-oral-antiviral-molnupiravir-reduced-the-risk-of-hospitalization-or-death-by-approximately-50-percent-compared-to-placebo-for-patients-with-mild-or-moderat/) (accessed on  
433 23/11/2021)
- 434 34. Pavan, M.; Bolcato, G.; Bassani, D.; Sturlese, M.; Moro, S. Supervised molecular dynamics (SuMD) insights into the mecha-  
435 nism of action of SARS-CoV-2 main protease inhibitor PF-07321332. *J. Enzyme Inhib. Med. Chem.* **2021**, *36*, 1646–1650.  
436 [[CrossRef](#)]
- 437 35. Ma, C.; Sacco, M.D.; Hurst, B.; Townsend, J.A.; Hu, Y.; Szeto, T.; Zhang, X.; Tarbet, B.; Marty M.T.; Chen, Y.; Wang, J.  
438 Boceprevir, GC-376, and calpain inhibitors II, XII inhibit SARS-CoV-2 viral replication by targeting the viral main protease.  
439 *Cell Res.* **2020**, *30*, 678–692. [[CrossRef](#)]
- 440 36. Hoffmann, M.; Mösbauer, K.; Hofmann-Winkler, H.; Kaul, A.; Kleine-Weber, H.; Kruger, N.; Gassen, N.C.; Muller, M.A.;  
441 Drosten, C.; Pohlmann, S. Chloroquine does not inhibit infection of human lung cells with SARS-CoV-2. *Nature* **2020**, *585*, 588–  
442 590. [[CrossRef](#)]
- 443 37. Nonaka, C.K.V.; Graf, T.; Barcia, C.A.L.; Costa, V.F.; de Oliveira, J.L.; Passos, R.H.; Bastos, I.N.; de Santana, M.C.B.; Santos,  
444 I.M.; de Souza, K.A.F.; Weber, T.G.L.; de Siqueira, I.C.; Rocha, C.A.G.; Mendes, A.V.A.; Souza, B.S.F. SARS-CoV-2 variant of  
445 concern P.1 (Gamma) infection in young and middle-aged patients admitted to the intensive care units of a single hospital in  
446 Salvador, Northeast Brazil, February 2021. *Int. J. Infect. Dis.* **2021**, *111*, 47–54. [[CrossRef](#)]
- 447 38. Faria, N.R.; Mellan, T.A.; Whittaker, C.; Claro, I.M.; Candido, D.D.S.; Mishra, S.; Crispim, M.E.; Sales, F.C.S.; Hawryluk, I.;  
448 Mccrone, J.T.; Hulsmit, R.J.G.; Franco, L.A.M.; Ramundo, M.S.; de Jesus, J.G.; Andrade, P.S.; Coletti, T.M.; Ferreira, G.M.; Sil-  
449 va, C.A.M.; Manuli E.R.; Pereira, R.H.M.; Peixoto, P.S.; Kraemer, M.U.G.; Jr, N.G.; Camilo, C.C.; Hoeltgebaum, H.; Souza,  
450 W.M.; Rocha, E.C.; de Souza, L.M.; de Pinho, M.C.; Araujo, L.J.T.; Malta, F.S.V.; de Lima, A.B.; Silva, J.P.; Zauli, D.A.G.; Fer-

- 451 reira, A.C.S.; Schnekenberg, R.P.; Laydon, D.J.; Walker, P.G.T.; Schluter, H.M.; dos Santos, A.L.P.; Vidal, M.S.; Del Caro, V.S.;  
452 Filho, R.M.F.; dos Santos, H.M.; Aguiar, R.S.; Proença-Modena, J.L.; Nelson, B.; Hay, J.A.; Monod, M.; Miscouridou, X.;  
453 Coupland, H.; Sonabend, R.; Vollmer, M.; Gandy, A.; Jr, C.A.P.; Nascimento, V.H.; Suchard, M.A.; Bowden, T.A.; Pond, S.L.K.;  
454 Wu, C.-H.; Ratmann, O.; Ferguson, N.M.; Dye, C.; Loman, N.J.; Lemey, P.; Rambaut, A.; Fraiji, N.A.; Carvalho, M.P.S.S.;  
455 Pybus, O.G.; Flaxman, S.; Bhatt, S.; Sabino, E.C. Genomics and epidemiology of a novel SARS-CoV-2 lineage in Manaus, Bra-  
456 zil. *Science* **2021**, 372, 815-821. [[CrossRef](#)]
- 457 39. Ferreira, A.C.; Soares, V.C.; de Azevedo-Quintanilha, I.G.; Dias, S.S.G.; Fintelman-Rodrigues, N.; Sacramento, C.Q.; Mattos,  
458 M.; de Freitas, C.S.; Temerozo, J.R.; Teixeira, L.; Hottz, E.D.; Barreto, E.A.; Pão, C.R.R.; Palhinha, L.; Miranda, M.; Bou-Habib,  
459 D.C.; Bozza, F.A.; Bozza, P.T.; Souza, T.M.L. SARS-CoV-2 engages inflammasome and pyroptosis in human primary mono-  
460 cytes. *Cell Death Discov.* **2021**, 7, 43. [[CrossRef](#)]
- 461 40. Antiviral Agents Against COVID-19 Infection (REVOLUTION). Available online:  
462 <https://clinicaltrials.gov/ct2/show/NCT04468087?term=Atazanavir&cond=SARS-CoV+Infection&draw=2&rank=3> (accessed on  
463 06/11/2021).
- 464

465

## SUPPLEMENTARY MATERIAL

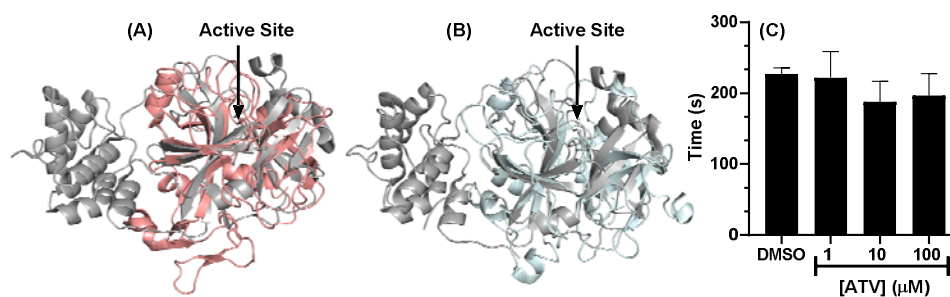

466

467 **Figure S1.** Superposition of the monomeric unit of M<sup>Pro</sup> (in gray, PDB code 7K40) with (A) FXa (in salmon, PDB code 2P16) and (B)  
468 thrombin (in cyan, PDB code 1KTS). For better interpretation the catalytic water (H<sub>2</sub>O<sub>cat</sub>) of M<sup>Pro</sup> is not shown. (C) Fibrin formation  
469 trial without and in the presence of three concentrations of ATV.

470
